# Supplementary material for: An unusual alkylidyne homologation
Source: Royal Society of Chemistry journal article supplement (doi:10.1039/c8cc00119g), 2018-01-01

## ELECTRONIC SUPPORTING INFORMATION

### An Unusual Alkylidyne Homologation

Yong-Shen Han, Anthony F. Hill\* and Richard Y. Kong

Research School of Chemistry, Australian National University, Canberra,

Australian Capital Territory, ACT 2601, Australia

Received 00th January 20xx,  
Accepted 00th January 20xx

DOI: 10.1039/x0xx00000x

www.rsc.org/

|                                                                                                                                              |   |
|----------------------------------------------------------------------------------------------------------------------------------------------|---|
| Experimental Procedures.....                                                                                                                 | 1 |
| General Considerations.....                                                                                                                  | 1 |
| Synthesis of $W(\equiv C^tBu)(SiCl_3)(CO)_2(dcpe)$ <b>4</b> .....                                                                            | 1 |
| Attempted Synthesis of $W(\equiv C^tBu)(SiMe_3)(CO)_2(dcpe)$<br>and observation of $W(CH^tBu)(\eta^2-Cl, Si-$<br>$SiCl_4)(CO)_2(dcpe)$ ..... | 2 |
| Crystal data for $C_{33}H_{58.7}Cl_{3.3}O_2P_2SiW \cdot CHCl_3$ ( <b>3</b> ).....                                                            | 2 |
| Discussion of the Crystal Structure of <b>3</b> .....                                                                                        | 2 |
| Crystal data for $C_{33}H_{57}O_2SiP_2Cl_3W$ ( <b>4</b> ).....                                                                               | 2 |
| Crystal data for $C_{32}H_{59}Cl_3P_2W$ ( <b>5</b> ) .....                                                                                   | 3 |
| Crystal data for $C_{26}H_{48}Cl_3OP_2W \cdot CHCl_3$ ( <b>7</b> ) .....                                                                     | 3 |
| Computational Analysis of $(Cl_3Si)(CO)_2(dmpe)W \equiv CH$ ....                                                                             | 3 |
| References.....                                                                                                                              | 4 |
| Selected Spectra .....                                                                                                                       | 5 |
| $^{31}P\{^1H\}$ NMR Data for Conversion of <b>4</b> to <b>5</b> , <b>6</b> and <b>9</b> ( $t$<br>= 1 and 72 hours). .....                    | 5 |
| Low-Field $^{13}C\{^1H\}$ NMR Data for Conversion of <b>4</b> to <b>5</b><br>and <b>6</b> .....                                              | 6 |
| $^1H$ - $^{13}C$ HMBC (3-4 bond optimised).....                                                                                              | 7 |
| NMR Data for $WCl_4(dcpe)$ and neohexene in final<br>product ( $t = 120$ hrs at room temperature). .....                                     | 8 |
| $^{31}P\{^1H\}$ NMR Spectrum .....                                                                                                           | 8 |
| $^1H$ NMR Spectrum of $[W(\equiv C^tBu)(SiCl_3)(CO)_2(dcpe)]$ <b>4</b> 9                                                                     |   |

|                                                                                           |    |
|-------------------------------------------------------------------------------------------|----|
| $^{13}C\{^1H\}$ NMR Spectrum of<br>$[W(\equiv C^tBu)(SiCl_3)(CO)_2(dcpe)]$ <b>4</b> ..... | 10 |
| $^{31}P\{^1H\}$ NMR Spectrum of<br>$[W(\equiv C^tBu)(SiCl_3)(CO)_2(dcpe)]$ <b>4</b> ..... | 11 |

### Experimental Procedures

#### General Considerations

All manipulations of air-sensitive compounds were carried out at room temperature under a dry oxygen-free nitrogen atmosphere using standard Schlenk, vacuum line, or inert atmosphere (argon) glovebox techniques with dried and degassed solvents. NMR spectra were obtained on a Bruker Avance 400 ( $^1H$  at 400.1 MHz,  $^{13}C$  at 100.5 MHz,  $^{31}P$  at 162.0 MHz), Bruker Avance 700 ( $^1H$  at 700.1 MHz,  $^{13}C$  at 176.1 MHz,  $^{31}P$  at 283.5 MHz), or Bruker Avance 800 with cryoprobe ( $^1H$  at 800.1 MHz,  $^{13}C$  at 200.2 MHz) spectrometer. Chemical shifts ( $\delta$ ) are reported in ppm and referenced to the solvent peak ( $^1H$ ,  $^{13}C$ ) or external 85%  $H_3PO_4$ . The multiplicities of NMR resonances are denoted by the abbreviations s (singlet), d (doublet), t (triplet), sep (septet), m (multiplet), and combinations thereof for more highly coupled systems and  $^nJ_{ab}$  reported in Hz. Whilst  $^{13}C\{^1H\}$  for carbon nuclei of the  $(C_6H_{11})_2P(CH_2CH_2)P(C_6H_{11})_2$  ligand were observed, their narrow spectral range precluded unequivocal assignment for the dcpe carbon environments. Similarly, proton environments within the dcpe ligand could not be uniquely identified due to the complex multiplicities and similar chemical shifts encountered. Infrared spectra were obtained using a Perkin-Elmer Spectrum One FT-IR spectrometer. Elemental microanalysis has been performed at the London Metropolitan University. Electrospray ionisation mass spectrometry (ESI-MS) was performed by the ANU Research School of Chemistry mass spectrometry service with acetonitrile or methanol as the matrix. Data for X-ray crystallography were collected on either an Oxford Diffraction SuperNova or Oxford Diffraction Xcalibur diffractometer. The synthesis of the complex  $[W(\equiv CH)Br(CO)_2(dcpe)]$  (**1**) has been described previously.<sup>1</sup>

#### Synthesis of $W(\equiv C^tBu)(SiCl_3)(CO)_2(dcpe)$ **3**

To a yellow solution of  $W(CH)(Br)(dcpe)(CO)_2$  (**1**: 151 mg, 0.200 mmol) in THF (10 mL) at  $-78^\circ C$  (dry ice/acetone), 0.38 mL of a 1.6 M solution of  $tBuLi$  in

hexanes (0.60 mmol) was added *via* syringe. The resultant dark red solution was allowed to stir for 30 minutes at  $-78^{\circ}\text{C}$  before 0.22 mL of a 1.0 M solution of  $\text{SiCl}_4$  (0.22 mmol) in THF was added *via* syringe. The reaction was allowed to stir at  $-78^{\circ}\text{C}$  for a further 30 minutes before removal of the cooling bath. THF was removed *in vacuo* and the product was extracted using DCM (2x 10 mL) *via* filtration through a glass frit from the insoluble LiBr precipitate. The DCM was removed *in vacuo* and resultant crude product was washed with benzene (2 x 5 mL) to afford a crude light yellow powder. Recrystallisation from DCM/hexane afforded **7** as bright yellow crystals. Yield 64 mg, 37%. IR ( $\text{CH}_2\text{Cl}_2$ )  $\nu/\text{cm}^{-1}$ : 1990 (CO), 1921 (CO). IR (Nujol)  $\nu/\text{cm}^{-1}$ : 1978 (CO), 1911 (CO).  $^1\text{H}$  NMR ( $\text{CD}_2\text{Cl}_2$ ,  $-40^{\circ}\text{C}$ ):  $\delta_{\text{H}}$  2.09 (m, 2 H, dcpe), 2.01–1.87 (m, 4 H, dcpe), 1.79–1.04 (m, 42 H, dcpe), 1.30 (s, 9 H,  $\text{C}(\text{CH}_3)_3$ ).  $^{13}\text{C}$  NMR ( $\text{C}_6\text{D}_6$ ,  $25^{\circ}\text{C}$ ):  $\delta_{\text{C}}$  324.0 ( $\text{W}\equiv\text{C}$ , observed through HMBC in  $\text{C}_6\text{D}_6$ , carbonyl resonance not observed), 54.2 pm ( $\text{C}(\text{CH}_3)_3$ ), 41.0 (d,  $^1J_{\text{CP}} = 21.2$  Hz,  $\text{CH}[\text{C}_6\text{H}_{11}]$ ), 38.9 (d,  $^1J_{\text{CP}} = 21.3$  Hz), 31.8 ( $\text{CH}_2[\text{C}_6\text{H}_{11}]$ ), 30.8 ( $\text{CH}_2[\text{C}_6\text{H}_{11}]$ ), 30.4 ( $\text{CH}_2[\text{C}_6\text{H}_{11}]$ ), 29.0 (d,  $J_{\text{CP}} = 3.9$ ,  $\text{CH}_2[\text{C}_6\text{H}_{11}]$ ), 28.9 ( $\text{CH}_2[\text{C}_6\text{H}_{11}]$ ), 27.8 ( $\text{C}(\text{CH}_3)_3$ ), 27.6–27.2 (m,  $3\times\text{CH}_2[\text{C}_6\text{H}_{11}]$ ), 26.2 ( $\text{CH}_2[\text{C}_6\text{H}_{11}]$ ), 26.0 ( $\text{CH}_2[\text{C}_6\text{H}_{11}]$ ), 22.1 (dd,  $^1J_{\text{CP}} = 22.9$ ,  $^2J_{\text{CP}} = 13.2$ ,  $\text{P}(\text{CH}_2)_2\text{P}$ ).  $^{31}\text{P}\{^1\text{H}\}$  NMR ( $\text{CD}_2\text{Cl}_2$ ,  $-40^{\circ}\text{C}$ ):  $\delta_{\text{P}}$  49.3 ( $^1J_{\text{PW}} = 216.1$ ). MS-ESI: 864.2173 [ $\text{M}$ ] $^{+}$ . Accurate mass: found 864.2173 [ $\text{M}$ ] $^{+}$ . Calcd for  $\text{C}_{33}\text{H}_{57}\text{O}_2\text{SiP}_2\text{Cl}_3\text{W}$  864.2178. Anal. found: C, 44.58; H, 7.17; N, 0.00%. Calcd. for  $\text{C}_{33}\text{H}_{57}\text{O}_2\text{SiP}_2\text{Cl}_3\text{W}$ : C, 45.77; H, 6.63; N, 0.00% (Hydrolytic and thermal sensitivity likely saw decomposition of sample *en route* to London Metropolitan University). Crystals suitable for crystallographic analysis were obtained *via* layering hexane over a solution of **4** in DCM at  $-20^{\circ}\text{C}$ .

## Attempted Synthesis of $\text{W}(\equiv\text{C}^t\text{Bu})(\text{SiMe}_3)(\text{CO})_2(\text{dcpe})$ and observation of $\text{W}(\text{CH}^t\text{Bu})(\eta^2\text{-Cl,Si-SiCl}_4)(\text{CO})_2(\text{dcpe})$ **8**

The above procedure was conducted, unsuccessfully, using excess  $\text{ClSiMe}_3$  in place of  $\text{SiCl}_4$ . On one occasion, which was not successfully reproduced, attempts to crystallise the crude product provided a small number of red crystals identified as a chloroform solvate of the tetrachlorosilane complex  $\text{W}(\text{CH}^t\text{Bu})(\eta^2\text{-Cl,Si-SiCl}_4)(\text{CO})_2(\text{dcpe})$  **8**.

### Crystal data for $\text{C}_{33}\text{H}_{58.7}\text{Cl}_{3.3}\text{O}_2\text{P}_2\text{SiW}\cdot\text{CHCl}_3$ (**8**)

$M_{\text{w}} = 997.73$ , monoclinic,  $P2_1/c$ ,  $a = 10.9285(2)$  Å,  $b = 19.4442(4)$  Å,  $c = 20.0693(5)$  Å,  $\beta = 98.632(2)^{\circ}$ ,  $V = 4216.35(17)$  Å $^3$ ,  $Z = 4$ ,  $\rho_{\text{calcd}} = 1.572$  Mg m $^{-3}$ ,  $\mu(\text{Cu K}\alpha) = 9.966$  mm $^{-1}$ ,  $T = 150(1)$  K, red plate,  $0.104 \times 0.055 \times 0.019$  mm, 8184 independent reflections,  $F^2$  refinement,  $R = 0.037$ ,  $wR = 0.097$  for 6702 reflections ( $I > 2\sigma(I)$ ),  $2\theta_{\text{max}} = 143.6^{\circ}$ , 427 parameters, 0 restraints (CCDC 1557985).

## Discussion of the Crystal Structure of **8**

The 7-coordinate tungsten may be described as an octahedron with the  $\text{Cl1-C2-C3}$  face capped by the  $\text{SiCl}_3$  ligand. The neopentylidene ligand has a  $\text{W1-C1-C6}$  angle of  $142.0(4)^{\circ}$  which

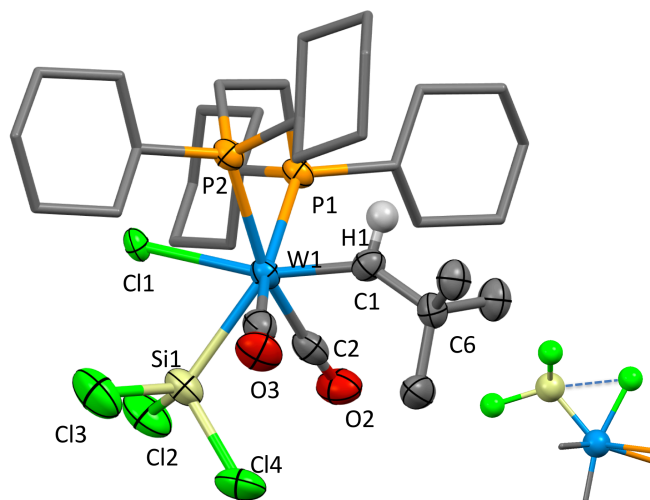

**Figure ESI-1.** Molecular structure of **8** in a crystal of **8**· $\text{CHCl}_3$  (60% displacement ellipsoids, most H-atoms omitted, cyclohexyl groups simplified). Selected bond lengths (Å) and angles:  $\text{W1-Cl1}$  2.5847(9),  $\text{W1-P1}$  2.6488(9),  $\text{W1-P2}$  2.6236(10),  $\text{W1-Si1}$  2.5799(12),  $\text{W1-C1}$  2.006(4),  $\text{C6-C1-W1}$   $142.0(3)^{\circ}$ ,  $\text{Cl2-Si1}$  2.054(2),  $\text{Cl3-Si1}$  2.025(3),  $\text{Cl4-Si1}$  2.1411(19),  $\text{Si1-Cl1}$  2.863 ( $\Sigma r_{\text{cov}} = 2.13$ ,  $\Sigma r_{\text{vdW}} = 3.55$ ). Inset = View normal to  $\text{Cl2-Cl3}$  vector.

given the coordinative saturation at tungsten may be attributed to steric pressures rather than any incipient  $\alpha$ -agostic interaction. The  $\text{W}=\text{C}$  bond length (2.010(6) Å) is somewhat long for a tungsten neopentylidene however it should be noted that data are otherwise unavailable for 7-coordinate complexes. Lower coordination geometries, *e.g.*, octahedral tungsten have shorter  $\text{W}-\text{C}$  separations (1.859–1.986 Å) invariably accompanied by  $\alpha$ -agostic  $\text{C}-\text{H}-\text{W}$  interactions.<sup>2</sup> Of note however is the geometry at silicon, which departs significantly from conventional tetrahedral hybridisation. This distortion (silicon angle sum for  $\text{W1}$ ,  $\text{Cl2}$  and  $\text{Cl3}$  =  $340.8^{\circ}$ ) is best understood in terms of a weak inter-ligand hypervalent interaction between the tungsten-bound chloride ( $\text{Cl1}$ ) and the silicon ( $\text{Cl1-Si1} = 2.862$  Å), which from this perspective begins to approach trigonal bipyramidal coordination.<sup>3</sup> The coordination of intact tin halides to zerovalent group 6 metal centres without  $\text{Sn}-\text{Cl}$  bond rupture is well-established, *e.g.*,  $[\text{W}(\text{SnCl}_4)(\text{CO})_3(\text{COD})]$ ,<sup>4</sup> however this type of interaction, effectively an intercepted  $\text{Si}-\text{C}$  oxidative addition, has not been previously documented for silicon halides and remains rare for germanium halides.

### Crystal data for $\text{C}_{33}\text{H}_{57}\text{O}_2\text{SiP}_2\text{Cl}_3\text{W}$ (**3**)

$M_{\text{w}} = 866.01$ , triclinic,  $P-1$ ,  $a = 13.3178(2)$  Å,  $b = 16.6846(3)$  Å,  $c = 18.1264(3)$  Å,  $\alpha = 99.3043(14)^{\circ}$ ,  $\beta = 95.4402(14)^{\circ}$ ,  $\gamma = 106.7416(16)^{\circ}$ ,  $V = 3763.42(12)$  Å $^3$ ,  $Z = 4$ ,  $\rho_{\text{calcd}} = 1.528$  Mg m $^{-3}$ ,  $\mu(\text{Cu K}\alpha) = 8.967$  mm $^{-1}$ ,  $T = 150(1)$  K, yellow block, 15176 independent reflections,  $F^2$  refinement,  $R = 0.031$ ,  $wR = 0.067$  for 13046 reflections ( $I > 2\sigma(I)$ ),  $2\theta_{\text{max}} = 147.9^{\circ}$ , 763 parameters, 0 restraints (CCDC 1557986).

### Crystal data for $C_{32}H_{59}Cl_3P_2W$ (**4**)

$M_w = 795.93$ , orthorhombic,  $Pbca$ ,  $a = 14.7156(4)$  Å,  $b = 23.4584(6)$  Å,  $c = 23.8845(7)$  Å,  $V = 8245.0(4)$  Å<sup>3</sup>,  $Z = 8$ ,  $\rho_{\text{calcd}} = 1.282$  Mg m<sup>-3</sup>,  $\mu(\text{Cu K}\alpha) = 7.83$  mm<sup>-1</sup>,  $T = 150(1)$  K, brown block,  $0.090 \times 0.076 \times 0.031$  mm, 8039 independent reflections,  $F^2$  refinement,  $R = 0.053$ ,  $wR = 0.122$  for 5937 reflections ( $I > 2\sigma(I)$ ),  $2\theta_{\text{max}} = 143.4^\circ$ , 359 parameters, 66 restraints (CCDC 1587450).

### Crystal data for $C_{26}H_{48}Cl_3OP_2W \cdot CHCl_3$ (**6**)

$M_w = 848.15$ , orthorhombic,  $P2_12_12_1$ ,  $a = 12.31677(14)$  Å,  $b = 14.9414(3)$  Å,  $c = 18.7844(3)$  Å,  $V = 3456.89(10)$  Å<sup>3</sup>,  $Z = 4$ ,  $\rho_{\text{calcd}} = 1.630$  Mg m<sup>-3</sup>,  $\mu = 11.486$  mm<sup>-1</sup>,  $T = 150(2)$  K, yellow block,  $0.227 \times 0.081 \times 0.064$  mm, 6981 independent reflections,  $F^2$  refinement,  $R = 0.050$ ,  $wR = 0.119$  for 6703 reflections ( $I > 2\sigma(I)$ ),  $2\theta_{\text{max}} = 148^\circ$ , 418 parameters, 84 restraints (CCDC 1557986).

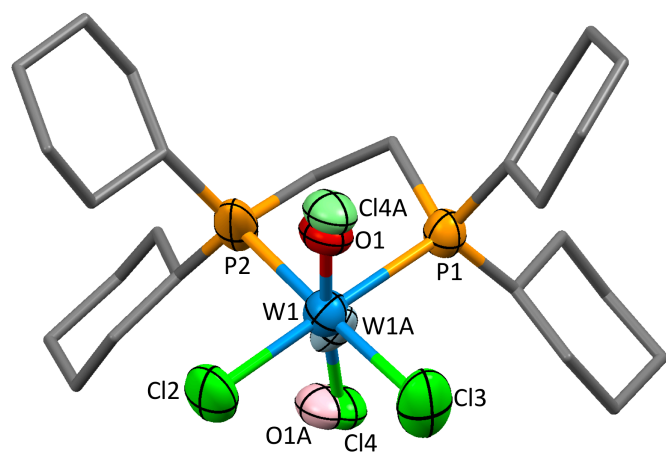

**Figure ESI-2.** Molecular structure of **6** in a crystal of **6**·CHCl<sub>3</sub> (60% displacement ellipsoids, H-atoms omitted, cyclohexyl groups simplified). Minor component (occupancy 0.254(9), designated 'A') of the O1=W1-Cl4 triatomic unit depicted in pastel shades. W1-Cl4 2.438(9), W1-P1 2.585(3), W1-P2 2.533(4), W1-Cl2 2.343(4), W1-Cl3 2.403(4), W1-O1 1.806(14).

In addition to one cyclohexyl ring showing positional disorder, the O1=W1-Cl4 spine displays disorder with the inverted triatomic based on O1A=W1A-Cl4A with occupancies for the two units refining to 0.746(9):0.254(9).

## Computational Analysis of $(Cl_3Si)(CO)_2(dmpe)W\equiv CH$

**Table ESI-1.** Comparison of Geometric and Spectroscopic Data

|                           | $Cl_3Si(CO)_2(dcpe)W\equiv C^*B$<br>(Measured) <sup>a</sup> | $Cl_3Si(CO)_2(dmpe)W\equiv CH$<br>(Calculated) |
|---------------------------|-------------------------------------------------------------|------------------------------------------------|
| W≡CH/Å                    | 1.834(3), 1.833(4)                                          | 1.823                                          |
| W-CO/Å                    | 2.013(3), 2.023(4)                                          | 2.013,                                         |
|                           | 2.015(4), 2.018(4)                                          | 2.013                                          |
| W-Si/Å                    | 2.6880(9), 2.6887(9)                                        | 2.753                                          |
| W-P/Å                     | 2.5473(8), 2.5590(8)                                        | 2.612,                                         |
|                           | 2.5618(8), 2.5544(8)                                        | 2.615                                          |
| P-W-P/°                   | 78.78(3), 79.26(3)                                          | 79.24                                          |
| $\nu_{CO}/\text{cm}^{-1}$ | 1990, 1921                                                  | 1983, 1929                                     |
| $\nu_{WC}/\text{cm}^{-1}$ | -                                                           | 954 vw                                         |

<sup>a</sup>Two crystallographically independent molecules

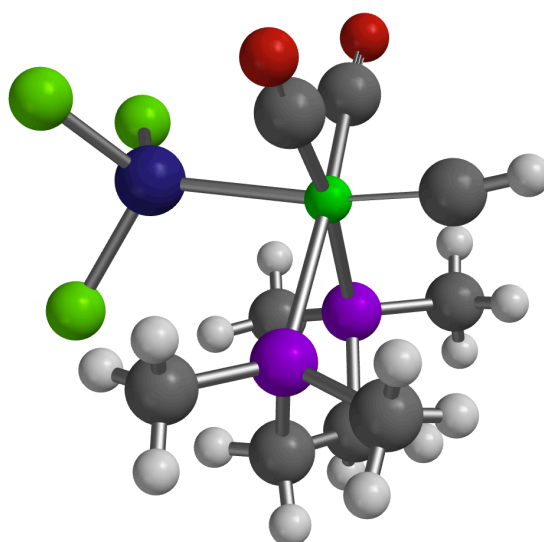

**Figure ESI-3.** Optimised Geometry for  $(Cl_3Si)(CO)_2(dmpe)W\equiv CH$

**Table ESI-2** Standard Nuclear Orientation (Å) for  $\text{Cl}_3\text{Si}(\text{CO})_2(\text{dmpe})\text{W}\equiv\text{CH}$  (Geometry Optimisation at DFT: B3LYP-LANL2DZ).

|    | Atom | X          | Y          | Z          |
|----|------|------------|------------|------------|
| 1  | W1   | -1.0418998 | 0.8705173  | 0.8747805  |
| 2  | C1   | -2.7242001 | 0.3852115  | 0.3686689  |
| 3  | H3   | -3.7846909 | 0.2021168  | 0.1866551  |
| 4  | P1   | 0.0499366  | 0.8856024  | -1.4977061 |
| 5  | P2   | -0.0047047 | -1.5288803 | 0.7991561  |
| 6  | C2   | -1.5896406 | 2.8049209  | 0.7650141  |
| 7  | O1   | -1.9611688 | 3.9154066  | 0.6667306  |
| 8  | C3   | -1.6182070 | 0.6950330  | 2.7955691  |
| 9  | O2   | -2.0091154 | 0.5640302  | 3.8961624  |
| 10 | Si1  | 1.2996704  | 1.8381941  | 1.9526223  |
| 11 | Cl1  | 1.5689420  | 4.0330462  | 2.1007919  |
| 12 | Cl2  | 3.2030915  | 1.2448209  | 0.8451282  |
| 13 | Cl3  | 1.7842219  | 1.1323491  | 4.0094729  |
| 14 | C4   | 1.1158455  | -0.6903563 | -1.7085560 |
| 15 | H2   | 2.0976610  | -0.4688939 | -1.2782996 |
| 16 | H1   | 1.2518980  | -0.8809816 | -2.7796946 |
| 17 | C5   | -1.2199159 | 0.7211404  | -2.8837169 |
| 18 | H5   | -1.8187936 | -0.1769901 | -2.7191898 |
| 19 | H8   | -0.7220925 | 0.6639785  | -3.8563389 |
| 20 | H11  | -1.8834207 | 1.5886765  | -2.8623219 |
| 21 | C6   | 0.4695843  | -1.9000126 | -1.0200679 |
| 22 | H12  | -0.4577173 | -2.1870572 | -1.5293361 |
| 23 | H13  | 1.1432436  | -2.7644454 | -1.0401857 |
| 24 | C7   | -1.1923939 | -2.9300544 | 1.2196758  |
| 25 | H9   | -2.1049069 | -2.8163274 | 0.6309454  |
| 26 | H14  | -1.4493547 | -2.8693148 | 2.2801230  |
| 27 | H15  | -0.7314975 | -3.9008950 | 1.0141599  |
| 28 | C8   | 1.5351600  | -2.0087131 | 1.7726003  |
| 29 | H10  | 2.3700784  | -1.3679513 | 1.4835195  |
| 30 | H16  | 1.7865927  | -3.0563878 | 1.5819919  |
| 31 | H17  | 1.3463963  | -1.8625500 | 2.8384868  |
| 32 | C9   | 1.1626862  | 2.2633109  | -2.1359375 |
| 33 | H7   | 2.0187778  | 2.3762722  | -1.4687951 |
| 34 | H18  | 0.5980656  | 3.1985937  | -2.1567364 |
| 35 | H19  | 1.5118684  | 2.0265900  | -3.1453723 |

## References

- 1 A. F. Hill, J. S. Ward and Y. Xiong, *Organometallics*, 2015, **34**, 5057–5064.
- 2 J. C. Axtell, R. R. Schrock, P. Muller, S. J. Smith and A. H. Hoveyda, *Organometallics*, 2014, **33**, 5342 – 5348 and refs. therein.
- 3 E. Brendler, T. Heine, A. F. Hill and J. Wagler, *Z. Anorg. Allg. Chem.*, 2009, **635**, 1300 – 1305.
- 4 M. Elder and D. Hall, *Inorg. Chem.*, 1969, **8**, 1268–1273.

## Selected Spectra

 $^{31}\text{P}\{^1\text{H}\}$  NMR Data for Conversion of **3** to **4**, **5** and **9** ( $t = 1$  and 72 hours).

The apparent asymmetry in the tungsten satellites surrounding peak the peak at  $\delta_{\text{P}} = 45.33$  ppm reflects the formation of the decomposition product  $\text{WCl}_4(\text{dcpe})$ , the resonance for which overlaps with the low frequency satellite. The peak at 54.7 ppm peak corresponds to **4**, while the AB system labelled ( $\text{CDCl}_3$ :  $\delta_{\text{A}} = 45.33$ ;  $\delta_{\text{B}} = 26.27$ ) is of **5**.

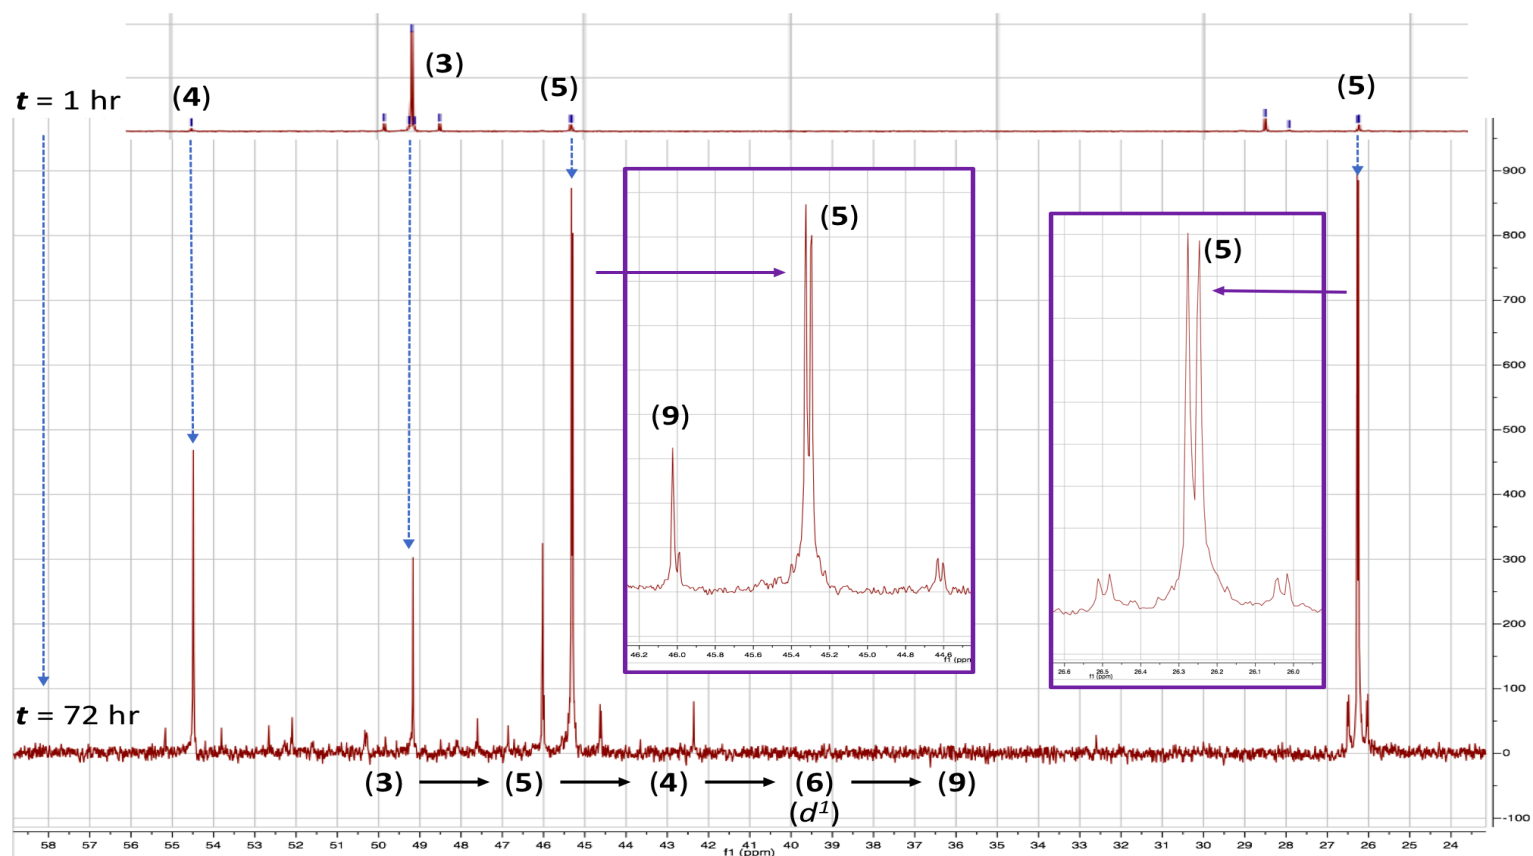

Low-Field  $^{13}\text{C}\{^1\text{H}\}$  NMR Data for Conversion of **4** to **5** and **6**.

The resonance at  $\delta_{\text{C}} = 212.3$  appears as an apparent triplet. The weak resonance at  $\delta_{\text{C}} = 288.0$  is attributed to the neoheptyldiyne complex **4**. The carbyne resonance for **5** appears as a doublet of doublets centred at  $\delta_{\text{C}} = 230.4$ .

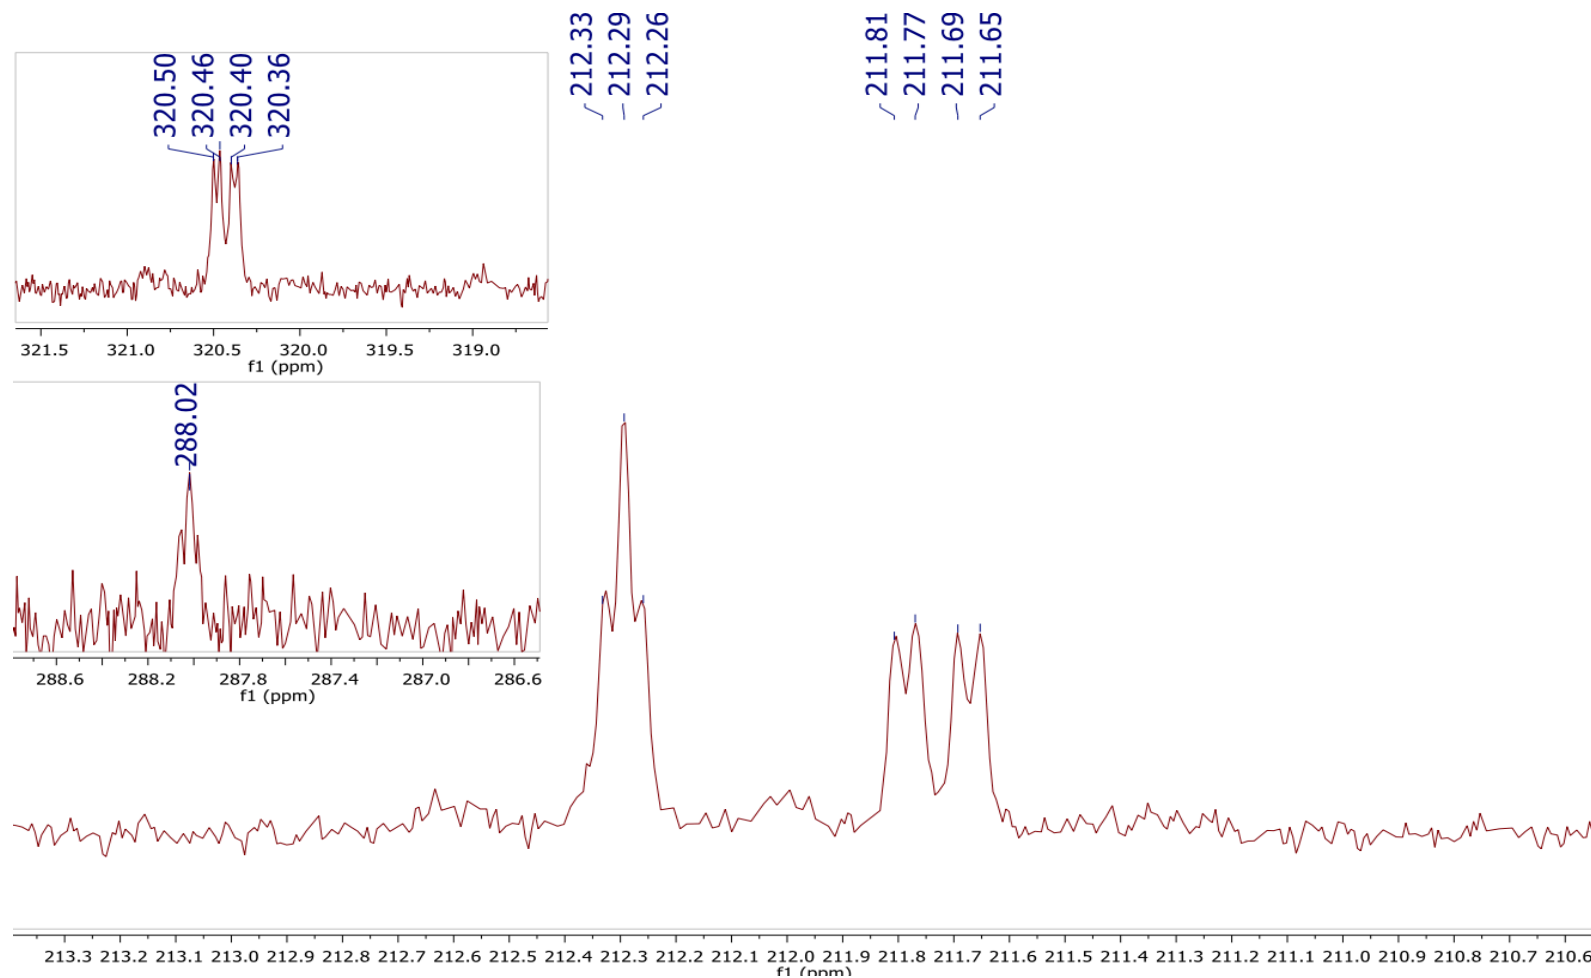

$^1\text{H}$ - $^{13}\text{C}$  HMBC (3-4 bond optimised).

Correlations are colour coded to their respective species. Correlations between the methylene group are NMR silent due to the likely nature of H/D exchange with adventitious  $\text{D}_2\text{O}$ .

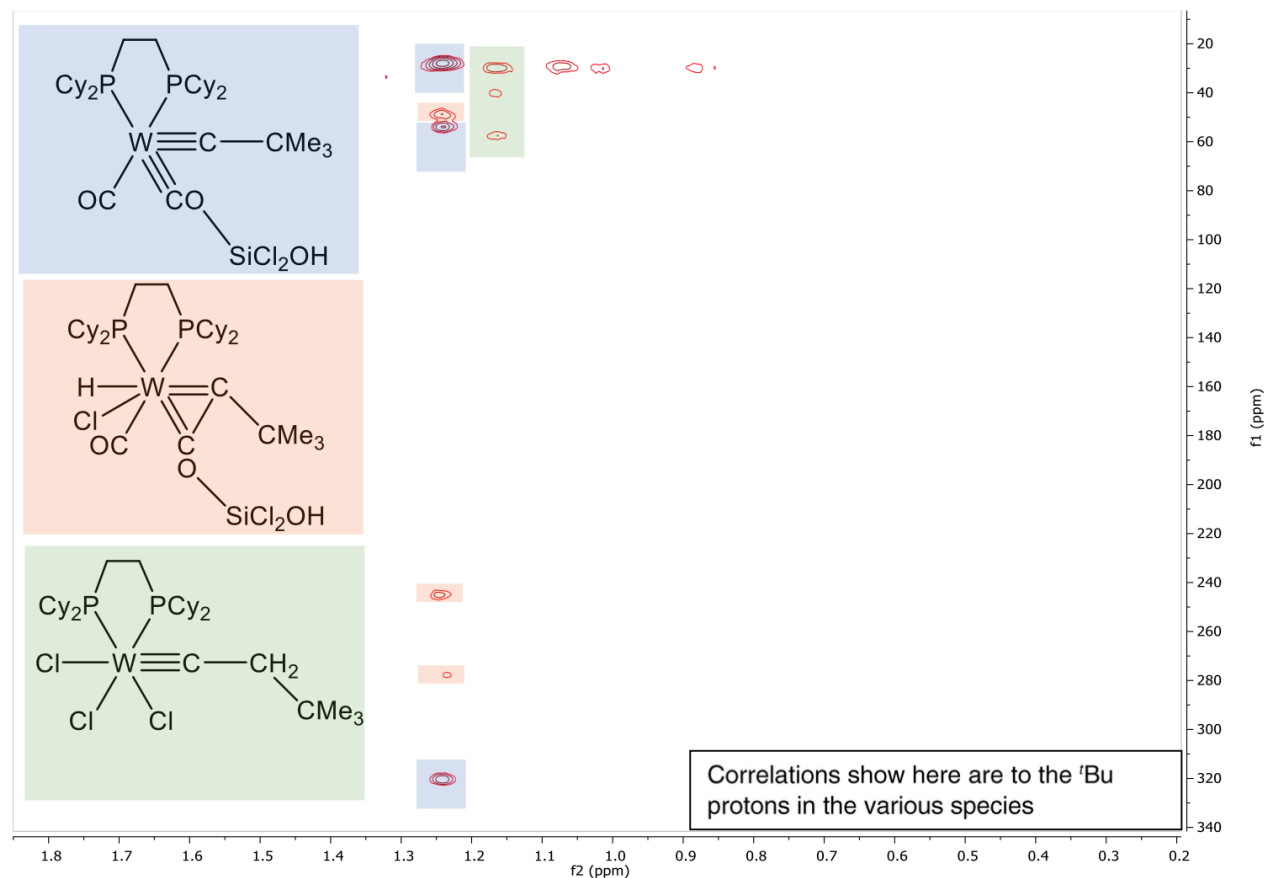

NMR Data for  $\text{WCl}_4(\text{dcpe})$  (**9**) and neohexene in final product ( $t = 120$  hrs at room temperature).

$^{31}\text{P}\{^1\text{H}\}$  NMR Spectrum

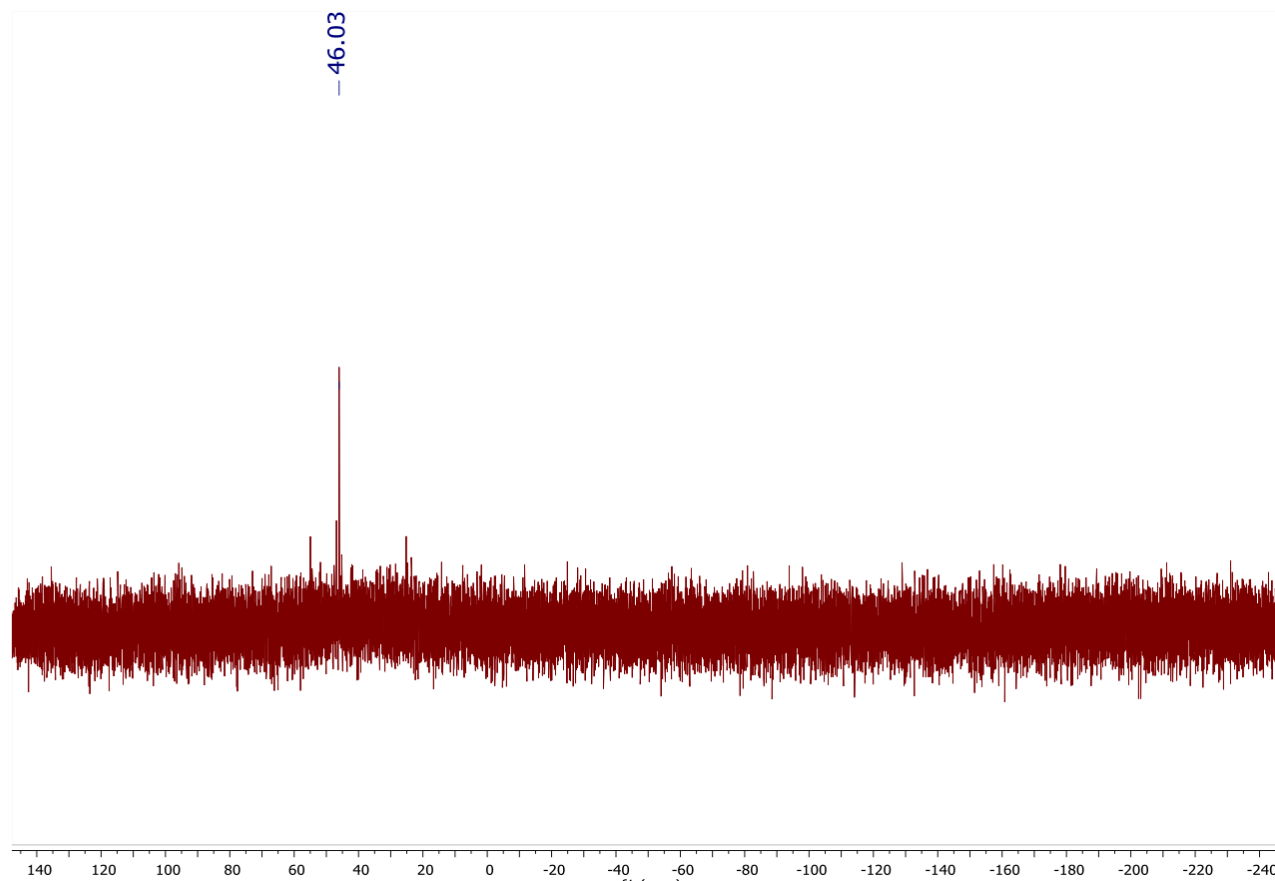

The dramatic reduction in signal to noise is consistent with the formation of NMR silent  $[\text{W}(=\text{O})\text{Cl}_3(\text{dcpe})]$  (**7**), with only trace amounts of (**6**) remaining in solution.



$^1\text{H}$  NMR Spectrum of  $[\text{W}(\equiv\text{C}^t\text{Bu})(\text{SiCl}_3)(\text{CO})_2(\text{dcpe})]$  **3**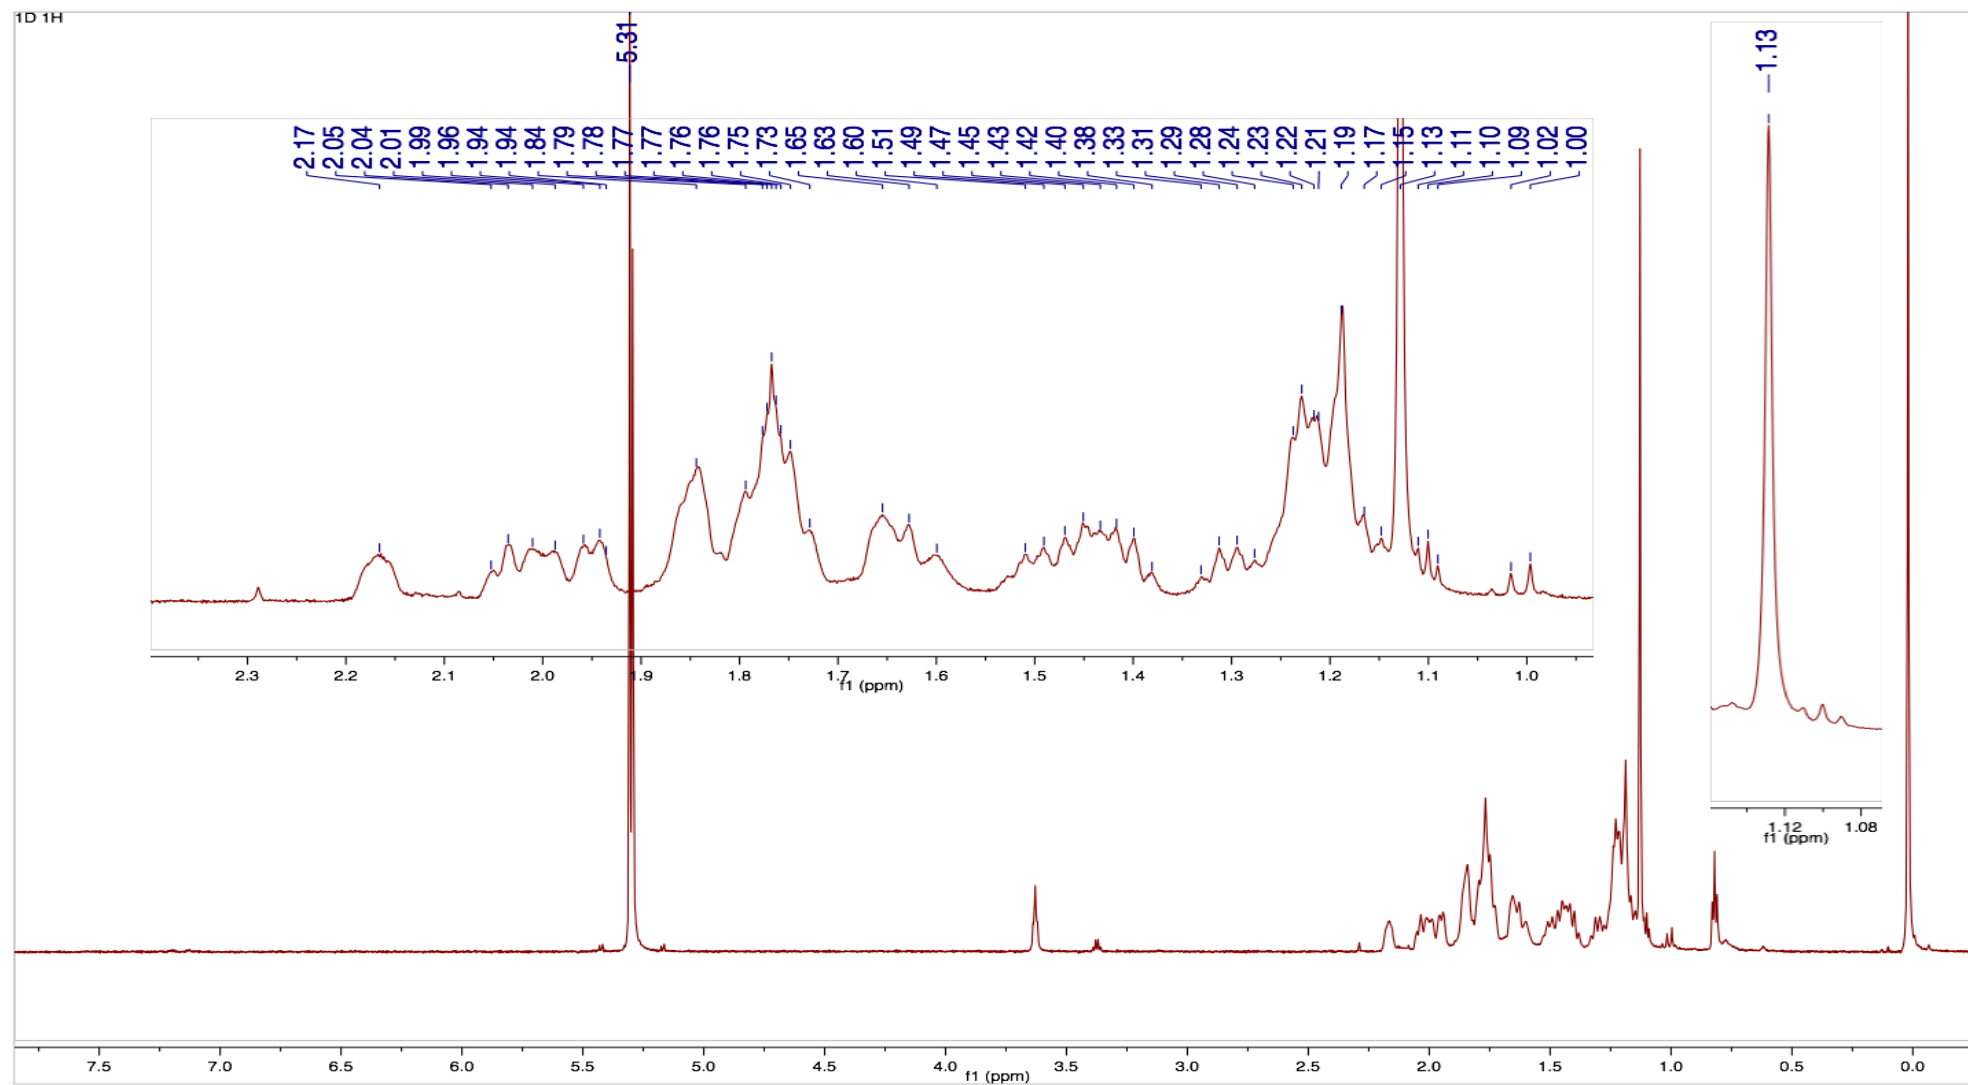

$^{13}\text{C}\{^1\text{H}\}$  NMR Spectrum of  $[\text{W}(\equiv\text{C}^t\text{Bu})(\text{SiCl}_3)(\text{CO})_2(\text{dcpe})]$  **3**

1D  $^{13}\text{C}$  NMR spectrum with NOE enhancement and decoupling (zgpg30.go) overnight experiment, type "halt" to end acquisition early.

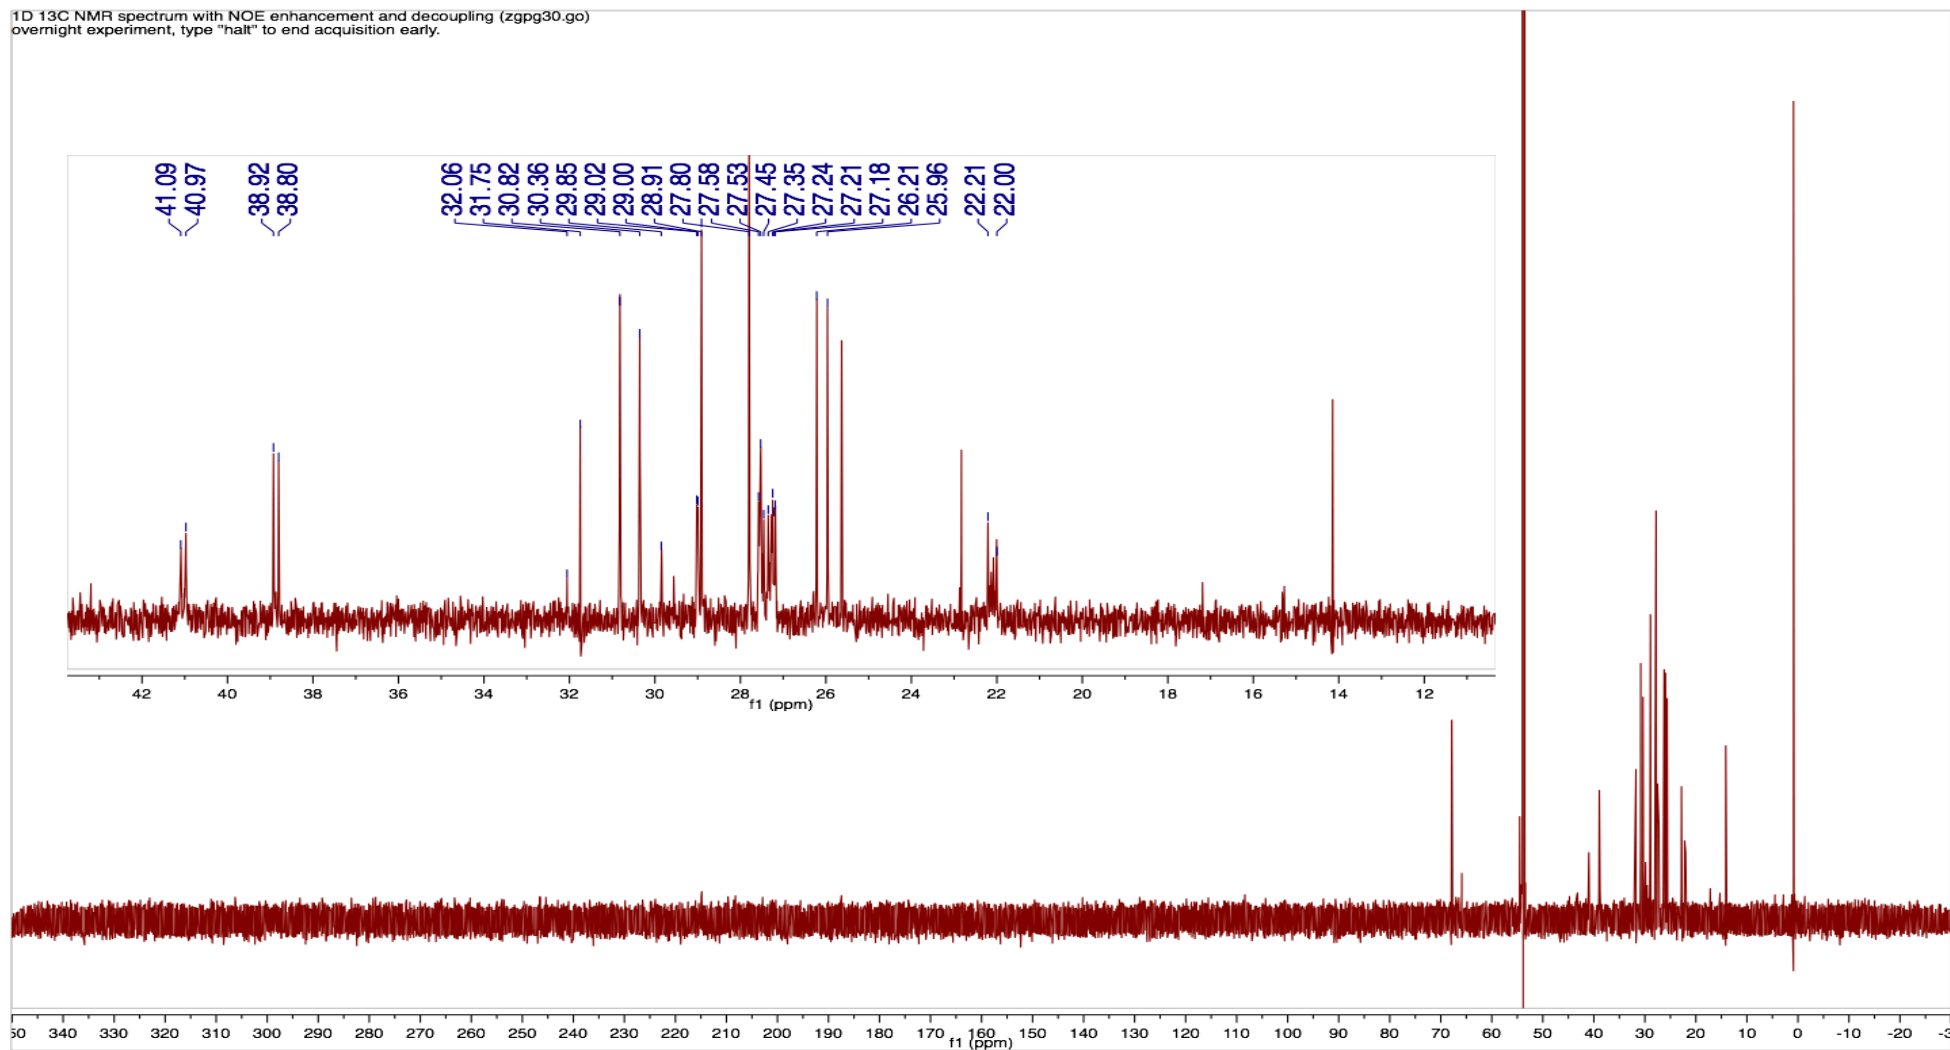

$^{31}\text{P}\{^1\text{H}\}$  NMR Spectrum of  $[\text{W}(\equiv\text{C}^t\text{Bu})(\text{SiCl}_3)(\text{CO})_2(\text{dcpe})]$  **3**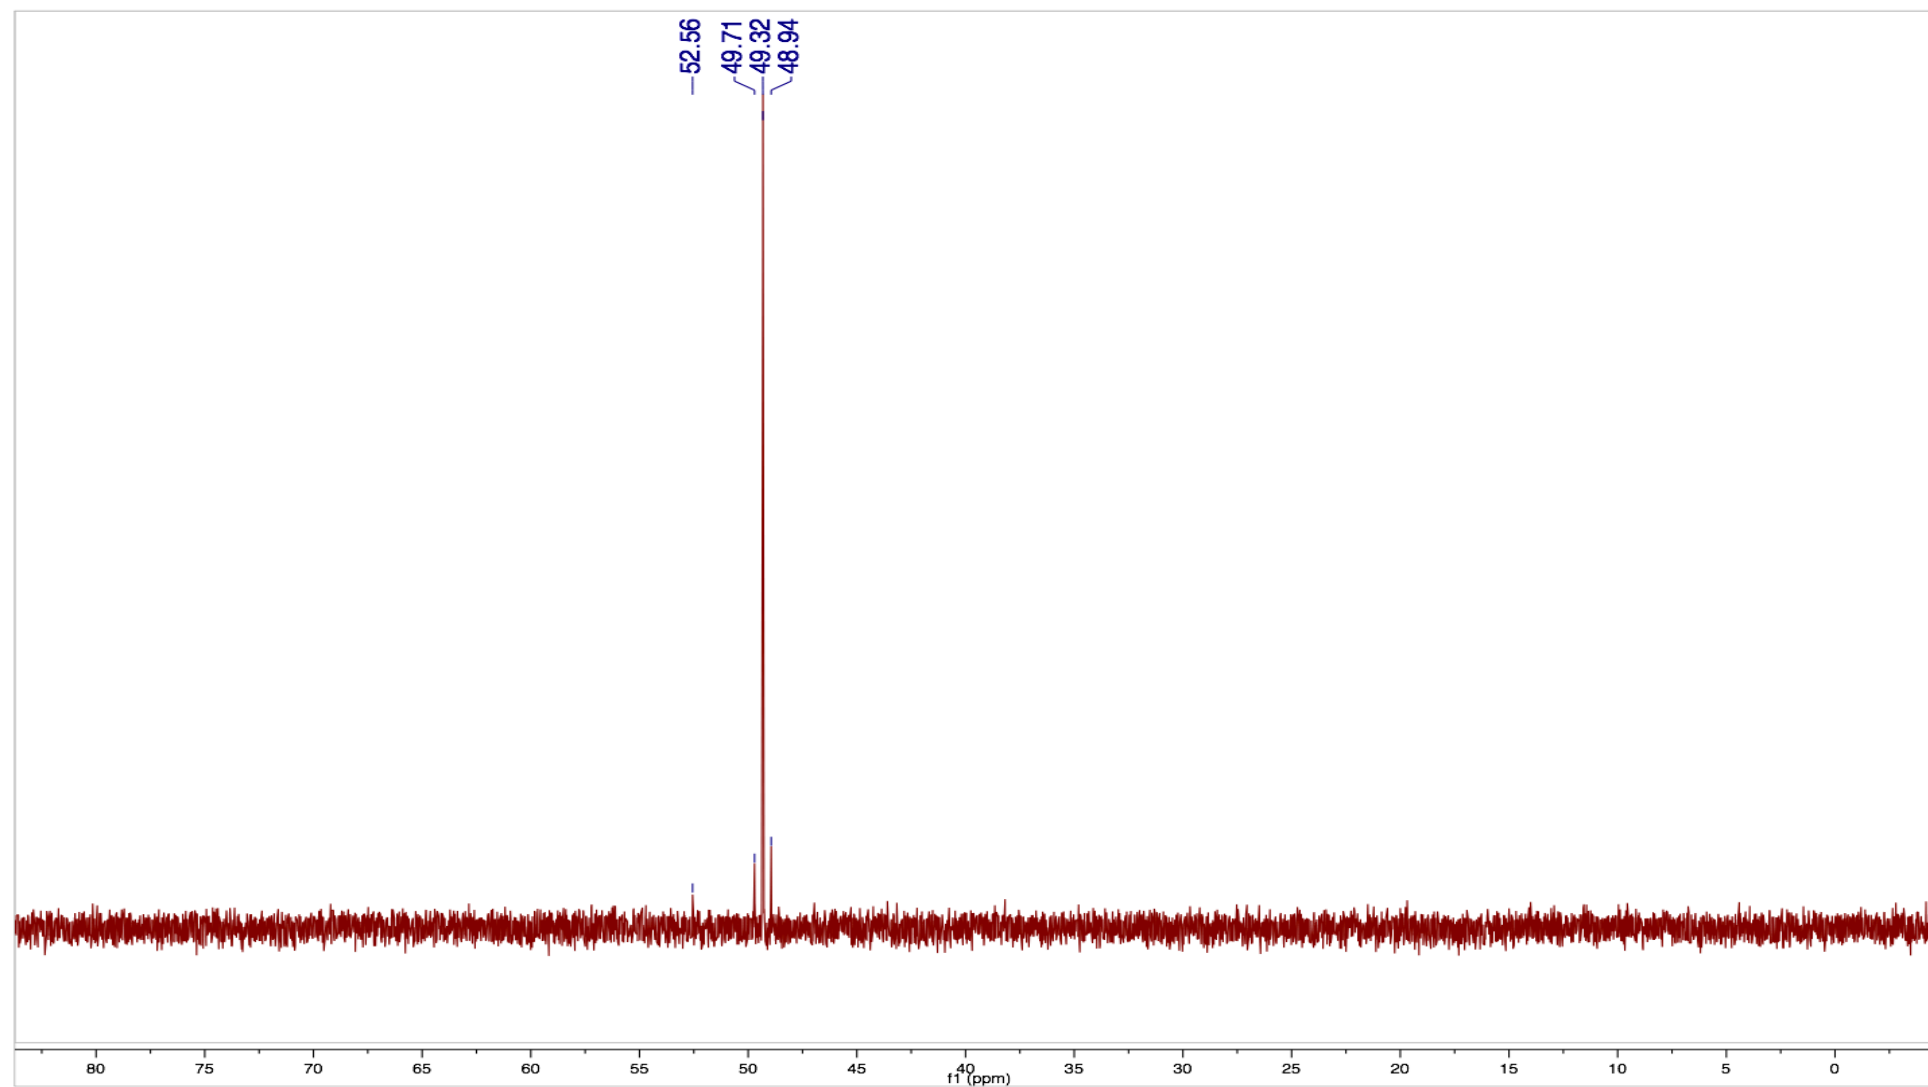

Supplement: c8cc00119g1.pdf [file c8cc00119g1.pdf]
